# Supplementary material
Source: PubMed Central journal article supplement (PMC6658868)
Supplement: ocy013_supp.pdf [file ocy013_supp.pdf]

# Interactive Medical Word Sense Disambiguation through Informed Learning

Yue Wang, Kai Zheng, Hua Xu, Qiaozhu Mei

## Appendix

**Table A1.** Interactive learning results for 198 ambiguous words in the MSH corpus.

Notes:

- Type “A” represents an Abbreviation; type “T” represents a Term; type “AT” represents an Abbreviation and Term.
- #S: number of senses.
- #inst: number of instances.
- RS: Random Sampling.
- AL: Active Learning.
- RR: ReQ-ReC expert.
- IL: Informed Learning.
- “IL > AL”: the ALC score of Informed Learning is greater than that of Active Learning. Equals 1 if true; 0 otherwise.
- “IL > RR”: the ALC score of Informed Learning is greater than that of ReQ-ReC expert. Equals 1 if true; 0 otherwise.

| ID | Word                      | Type | #S | #inst | #inst in top 5 senses |    |    |    |    | major sense ratio | ALC scores |        |        |        | IL > AL | IL > RR |
|----|---------------------------|------|----|-------|-----------------------|----|----|----|----|-------------------|------------|--------|--------|--------|---------|---------|
|    |                           |      |    |       | S1                    | S2 | S3 | S4 | S5 |                   | RS         | AL     | RR     | IL     |         |         |
| 1  | AA                        | A    | 2  | 198   | 99                    | 99 | 0  | 0  | 0  | 0.5000            | 0.8965     | 0.9385 | 0.9619 | 0.9784 | 1       | 1       |
| 2  | ADA                       | A    | 2  | 198   | 99                    | 99 | 0  | 0  | 0  | 0.5000            | 0.8335     | 0.8883 | 0.9416 | 0.9347 | 1       | 0       |
| 3  | ADH                       | A    | 2  | 198   | 99                    | 99 | 0  | 0  | 0  | 0.5000            | 0.9002     | 0.9512 | 0.9649 | 0.9771 | 1       | 1       |
| 4  | ADP                       | A    | 2  | 149   | 99                    | 50 | 0  | 0  | 0  | 0.6644            | 0.8971     | 0.9166 | 0.8689 | 0.9102 | 0       | 1       |
| 5  | Adrenal                   | T    | 2  | 198   | 99                    | 99 | 0  | 0  | 0  | 0.5000            | 0.6467     | 0.7324 | 0.7653 | 0.7608 | 1       | 0       |
| 6  | Ala                       | A    | 3  | 297   | 99                    | 99 | 99 | 0  | 0  | 0.3333            | 0.7698     | 0.8337 | 0.8812 | 0.9149 | 1       | 1       |
| 7  | ALS                       | A    | 2  | 198   | 99                    | 99 | 0  | 0  | 0  | 0.5000            | 0.9152     | 0.9559 | 0.9711 | 0.9785 | 1       | 1       |
| 8  | ANA                       | A    | 2  | 198   | 99                    | 99 | 0  | 0  | 0  | 0.5000            | 0.8769     | 0.8982 | 0.9325 | 0.9430 | 1       | 1       |
| 9  | Arteriovenous Anastomoses | T    | 2  | 129   | 99                    | 30 | 0  | 0  | 0  | 0.7674            | 0.8267     | 0.8724 | 0.8881 | 0.9203 | 1       | 1       |
| 10 | Astragalus                | T    | 2  | 198   | 99                    | 99 | 0  | 0  | 0  | 0.5000            | 0.9259     | 0.9464 | 0.9441 | 0.9606 | 1       | 1       |
| 11 | B-Cell Leukemia           | AT   | 2  | 158   | 92                    | 66 | 0  | 0  | 0  | 0.5823            | 0.6888     | 0.7288 | 0.7283 | 0.7647 | 1       | 1       |
| 12 | BAT                       | T    | 2  | 198   | 99                    | 99 | 0  | 0  | 0  | 0.5000            | 0.9268     | 0.9639 | 0.9705 | 0.9836 | 1       | 1       |
| 13 | BLM                       | A    | 2  | 198   | 99                    | 99 | 0  | 0  | 0  | 0.5000            | 0.9422     | 0.9688 | 0.9698 | 0.9903 | 1       | 1       |
| 14 | Borrelia                  | T    | 2  | 198   | 99                    | 99 | 0  | 0  | 0  | 0.5000            | 0.6022     | 0.6745 | 0.7338 | 0.7315 | 1       | 0       |
| 15 | BPD                       | A    | 2  | 198   | 99                    | 99 | 0  | 0  | 0  | 0.5000            | 0.9389     | 0.9739 | 0.9804 | 0.9928 | 1       | 1       |
| 16 | BR                        | A    | 2  | 170   | 99                    | 71 | 0  | 0  | 0  | 0.5824            | 0.7894     | 0.8860 | 0.9041 | 0.9367 | 1       | 1       |
| 17 | Brucella abortus          | T    | 2  | 180   | 99                    | 81 | 0  | 0  | 0  | 0.5500            | 0.8075     | 0.8462 | 0.8231 | 0.8697 | 1       | 1       |
| 18 | BSA                       | A    | 2  | 198   | 99                    | 99 | 0  | 0  | 0  | 0.5000            | 0.8930     | 0.9705 | 0.9787 | 0.9971 | 1       | 1       |
| 19 | BSE                       | A    | 2  | 198   | 99                    | 99 | 0  | 0  | 0  | 0.5000            | 0.9465     | 0.9821 | 0.9865 | 0.9970 | 1       | 1       |
| 20 | Ca                        | A    | 4  | 396   | 99                    | 99 | 99 | 99 | 0  | 0.2500            | 0.5396     | 0.5952 | 0.6158 | 0.6619 | 1       | 1       |
| 21 | CAD                       | A    | 2  | 198   | 99                    | 99 | 0  | 0  | 0  | 0.5000            | 0.9122     | 0.9504 | 0.9575 | 0.9750 | 1       | 1       |

|    |                                      |    |   |     |    |    |    |   |   |        |        |        |        |        |   |   |
|----|--------------------------------------|----|---|-----|----|----|----|---|---|--------|--------|--------|--------|--------|---|---|
| 22 | Callus                               | T  | 2 | 150 | 99 | 51 | 0  | 0 | 0 | 0.6600 | 0.7839 | 0.8732 | 0.8874 | 0.9167 | 1 | 1 |
| 23 | CAM                                  | A  | 2 | 198 | 99 | 99 | 0  | 0 | 0 | 0.5000 | 0.8142 | 0.9372 | 0.9326 | 0.9556 | 1 | 1 |
| 24 | Cardiac<br>pacemaker                 | T  | 2 | 198 | 99 | 99 | 0  | 0 | 0 | 0.5000 | 0.8327 | 0.8776 | 0.9065 | 0.9141 | 1 | 1 |
| 25 | CCD                                  | A  | 2 | 141 | 99 | 42 | 0  | 0 | 0 | 0.7021 | 0.9124 | 0.9770 | 0.9818 | 0.9979 | 1 | 1 |
| 26 | CCI4                                 | A  | 2 | 198 | 99 | 99 | 0  | 0 | 0 | 0.5000 | 0.8857 | 0.9593 | 0.9675 | 0.9877 | 1 | 1 |
| 27 | CDA                                  | A  | 2 | 198 | 99 | 99 | 0  | 0 | 0 | 0.5000 | 0.9298 | 0.9736 | 0.9796 | 0.9970 | 1 | 1 |
| 28 | CDR                                  | A  | 2 | 147 | 99 | 48 | 0  | 0 | 0 | 0.6735 | 0.8605 | 0.9521 | 0.9619 | 0.9824 | 1 | 1 |
| 29 | Cell                                 | AT | 2 | 198 | 99 | 99 | 0  | 0 | 0 | 0.5000 | 0.8340 | 0.8809 | 0.9208 | 0.9323 | 1 | 1 |
| 30 | Cement                               | T  | 2 | 185 | 99 | 86 | 0  | 0 | 0 | 0.5351 | 0.7523 | 0.7838 | 0.7951 | 0.8414 | 1 | 1 |
| 31 | CH                                   | A  | 2 | 148 | 91 | 57 | 0  | 0 | 0 | 0.6149 | 0.7719 | 0.8460 | 0.8592 | 0.8925 | 1 | 1 |
| 32 | Cholera                              | T  | 2 | 198 | 99 | 99 | 0  | 0 | 0 | 0.5000 | 0.8161 | 0.8319 | 0.8612 | 0.8771 | 1 | 1 |
| 33 | CI                                   | A  | 2 | 183 | 99 | 84 | 0  | 0 | 0 | 0.5410 | 0.8175 | 0.8824 | 0.9199 | 0.9307 | 1 | 1 |
| 34 | Cilia                                | T  | 2 | 156 | 99 | 57 | 0  | 0 | 0 | 0.6346 | 0.8446 | 0.8314 | 0.9100 | 0.9396 | 1 | 1 |
| 35 | CIS                                  | A  | 2 | 153 | 99 | 54 | 0  | 0 | 0 | 0.6471 | 0.8905 | 0.9621 | 0.9652 | 0.9871 | 1 | 1 |
| 36 | CNS                                  | A  | 2 | 198 | 99 | 99 | 0  | 0 | 0 | 0.5000 | 0.9197 | 0.9480 | 0.9572 | 0.9679 | 1 | 1 |
| 37 | Coffee                               | T  | 2 | 198 | 99 | 99 | 0  | 0 | 0 | 0.5000 | 0.7110 | 0.6634 | 0.7593 | 0.7550 | 1 | 0 |
| 38 | Cold                                 | AT | 3 | 260 | 99 | 99 | 62 | 0 | 0 | 0.3808 | 0.6538 | 0.7357 | 0.7800 | 0.8334 | 1 | 1 |
| 39 | Compliance                           | T  | 2 | 198 | 99 | 99 | 0  | 0 | 0 | 0.5000 | 0.7227 | 0.7701 | 0.8370 | 0.8251 | 1 | 0 |
| 40 | Cortex                               | T  | 2 | 198 | 99 | 99 | 0  | 0 | 0 | 0.5000 | 0.8728 | 0.9392 | 0.9515 | 0.9697 | 1 | 1 |
| 41 | Cortical                             | T  | 3 | 297 | 99 | 99 | 99 | 0 | 0 | 0.3333 | 0.6587 | 0.7197 | 0.7830 | 0.8578 | 1 | 1 |
| 42 | CP                                   | A  | 3 | 297 | 99 | 99 | 99 | 0 | 0 | 0.3333 | 0.8494 | 0.9381 | 0.9468 | 0.9918 | 1 | 1 |
| 43 | Crack                                | T  | 2 | 163 | 99 | 64 | 0  | 0 | 0 | 0.6074 | 0.8740 | 0.8970 | 0.9368 | 0.9396 | 1 | 1 |
| 44 | CRF                                  | A  | 2 | 198 | 99 | 99 | 0  | 0 | 0 | 0.5000 | 0.9414 | 0.9696 | 0.9774 | 0.9957 | 1 | 1 |
| 45 | cRNA                                 | A  | 2 | 198 | 99 | 99 | 0  | 0 | 0 | 0.5000 | 0.8803 | 0.8691 | 0.9576 | 0.9668 | 1 | 1 |
| 46 | Crown                                | T  | 2 | 198 | 99 | 99 | 0  | 0 | 0 | 0.5000 | 0.6755 | 0.7545 | 0.8236 | 0.8119 | 1 | 0 |
| 47 | CTX                                  | A  | 2 | 183 | 99 | 84 | 0  | 0 | 0 | 0.5410 | 0.9497 | 0.9751 | 0.9769 | 0.9947 | 1 | 1 |
| 48 | DAT                                  | A  | 2 | 198 | 99 | 99 | 0  | 0 | 0 | 0.5000 | 0.8914 | 0.9550 | 0.9717 | 0.9931 | 1 | 1 |
| 49 | DBA                                  | A  | 2 | 183 | 99 | 84 | 0  | 0 | 0 | 0.5410 | 0.9319 | 0.9685 | 0.9721 | 0.9888 | 1 | 1 |
| 50 | dC                                   | A  | 2 | 198 | 99 | 99 | 0  | 0 | 0 | 0.5000 | 0.8508 | 0.9418 | 0.9454 | 0.9641 | 1 | 1 |
| 51 | DDD                                  | A  | 2 | 198 | 99 | 99 | 0  | 0 | 0 | 0.5000 | 0.8476 | 0.8839 | 0.8963 | 0.9129 | 1 | 1 |
| 52 | DDS                                  | A  | 3 | 220 | 99 | 99 | 22 | 0 | 0 | 0.4500 | 0.8252 | 0.8563 | 0.8935 | 0.9479 | 1 | 1 |
| 53 | DE                                   | A  | 2 | 126 | 99 | 27 | 0  | 0 | 0 | 0.7857 | 0.7911 | 0.8440 | 0.8143 | 0.8666 | 1 | 1 |
| 54 | DI                                   | A  | 2 | 198 | 99 | 99 | 0  | 0 | 0 | 0.5000 | 0.9459 | 0.9719 | 0.9740 | 0.9946 | 1 | 1 |
| 55 | Digestive                            | T  | 2 | 198 | 99 | 99 | 0  | 0 | 0 | 0.5000 | 0.6733 | 0.7108 | 0.7696 | 0.7802 | 1 | 1 |
| 56 | DON                                  | A  | 2 | 126 | 99 | 27 | 0  | 0 | 0 | 0.7857 | 0.8682 | 0.9263 | 0.9383 | 0.9620 | 1 | 1 |
| 57 | drinking                             | T  | 2 | 198 | 99 | 99 | 0  | 0 | 0 | 0.5000 | 0.7855 | 0.8773 | 0.8872 | 0.9155 | 1 | 1 |
| 58 | eCG                                  | A  | 2 | 198 | 99 | 99 | 0  | 0 | 0 | 0.5000 | 0.8990 | 0.9203 | 0.9507 | 0.9648 | 1 | 1 |
| 59 | Eels                                 | AT | 2 | 130 | 99 | 31 | 0  | 0 | 0 | 0.7615 | 0.8834 | 0.9354 | 0.9276 | 0.9600 | 1 | 1 |
| 60 | EGG                                  | T  | 2 | 198 | 99 | 99 | 0  | 0 | 0 | 0.5000 | 0.6933 | 0.7275 | 0.7827 | 0.7768 | 1 | 0 |
| 61 | EM                                   | A  | 2 | 129 | 99 | 30 | 0  | 0 | 0 | 0.7674 | 0.8544 | 0.9639 | 0.9592 | 0.9877 | 1 | 1 |
| 62 | EMS                                  | A  | 2 | 198 | 99 | 99 | 0  | 0 | 0 | 0.5000 | 0.8615 | 0.8666 | 0.9372 | 0.9370 | 1 | 0 |
| 63 | Epi                                  | A  | 2 | 198 | 99 | 99 | 0  | 0 | 0 | 0.5000 | 0.8569 | 0.9214 | 0.9366 | 0.9725 | 1 | 1 |
| 64 | ERP                                  | A  | 2 | 198 | 99 | 99 | 0  | 0 | 0 | 0.5000 | 0.9388 | 0.9827 | 0.9867 | 0.9972 | 1 | 1 |
| 65 | ERUPTION                             | T  | 2 | 197 | 99 | 98 | 0  | 0 | 0 | 0.5025 | 0.8952 | 0.9340 | 0.9504 | 0.9657 | 1 | 1 |
| 66 | Erythrocytes                         | T  | 2 | 198 | 99 | 99 | 0  | 0 | 0 | 0.5000 | 0.6470 | 0.7023 | 0.7277 | 0.7292 | 1 | 1 |
| 67 | Exercises                            | T  | 2 | 198 | 99 | 99 | 0  | 0 | 0 | 0.5000 | 0.6745 | 0.7064 | 0.7613 | 0.7742 | 1 | 1 |
| 68 | FA                                   | A  | 2 | 198 | 99 | 99 | 0  | 0 | 0 | 0.5000 | 0.8963 | 0.9704 | 0.9759 | 0.9969 | 1 | 1 |
| 69 | Familial<br>Adenomatous<br>Polyposis | T  | 2 | 198 | 99 | 99 | 0  | 0 | 0 | 0.5000 | 0.7379 | 0.7624 | 0.8062 | 0.8045 | 1 | 0 |
| 70 | FAS                                  | A  | 2 | 198 | 99 | 99 | 0  | 0 | 0 | 0.5000 | 0.9421 | 0.9824 | 0.9850 | 0.9999 | 1 | 1 |
| 71 | Fe                                   | A  | 2 | 198 | 99 | 99 | 0  | 0 | 0 | 0.5000 | 0.8091 | 0.8625 | 0.8899 | 0.9089 | 1 | 1 |
| 72 | Fish                                 | AT | 2 | 198 | 99 | 99 | 0  | 0 | 0 | 0.5000 | 0.8261 | 0.8943 | 0.9178 | 0.9316 | 1 | 1 |

|     |                      |    |   |     |    |    |    |   |   |        |        |        |        |        |   |   |
|-----|----------------------|----|---|-----|----|----|----|---|---|--------|--------|--------|--------|--------|---|---|
| 73  | Follicle             | T  | 2 | 198 | 99 | 99 | 0  | 0 | 0 | 0.5000 | 0.8198 | 0.9057 | 0.9168 | 0.9531 | 1 | 1 |
| 74  | Follicles            | T  | 2 | 198 | 99 | 99 | 0  | 0 | 0 | 0.5000 | 0.8134 | 0.9236 | 0.9402 | 0.9634 | 1 | 1 |
| 75  | FTC                  | A  | 2 | 198 | 99 | 99 | 0  | 0 | 0 | 0.5000 | 0.8557 | 0.9117 | 0.9482 | 0.9541 | 1 | 1 |
| 76  | GAG                  | A  | 2 | 198 | 99 | 99 | 0  | 0 | 0 | 0.5000 | 0.9036 | 0.9507 | 0.9541 | 0.9815 | 1 | 1 |
| 77  | Gamma-Interferon     | T  | 2 | 198 | 99 | 99 | 0  | 0 | 0 | 0.5000 | 0.6857 | 0.7410 | 0.7775 | 0.7696 | 1 | 0 |
| 78  | Ganglion             | T  | 2 | 198 | 99 | 99 | 0  | 0 | 0 | 0.5000 | 0.8603 | 0.8679 | 0.8987 | 0.9088 | 1 | 1 |
| 79  | Gas                  | T  | 2 | 198 | 99 | 99 | 0  | 0 | 0 | 0.5000 | 0.8199 | 0.8299 | 0.8892 | 0.9185 | 1 | 1 |
| 80  | Glycoside            | T  | 2 | 198 | 99 | 99 | 0  | 0 | 0 | 0.5000 | 0.8020 | 0.8929 | 0.8913 | 0.9409 | 1 | 1 |
| 81  | Haemophilus ducreyi  | T  | 2 | 153 | 99 | 54 | 0  | 0 | 0 | 0.6471 | 0.7798 | 0.8822 | 0.8803 | 0.8974 | 1 | 1 |
| 82  | HCl                  | A  | 2 | 198 | 99 | 99 | 0  | 0 | 0 | 0.5000 | 0.9458 | 0.9779 | 0.9800 | 0.9943 | 1 | 1 |
| 83  | Heregulin            | T  | 2 | 173 | 99 | 74 | 0  | 0 | 0 | 0.5723 | 0.6726 | 0.7382 | 0.7880 | 0.7935 | 1 | 1 |
| 84  | HGF                  | A  | 2 | 192 | 99 | 93 | 0  | 0 | 0 | 0.5156 | 0.7301 | 0.8180 | 0.8620 | 0.8727 | 1 | 1 |
| 85  | HHV 8                | A  | 2 | 176 | 99 | 77 | 0  | 0 | 0 | 0.5625 | 0.7612 | 0.8006 | 0.8015 | 0.8266 | 1 | 1 |
| 86  | Hip                  | T  | 2 | 165 | 99 | 66 | 0  | 0 | 0 | 0.6000 | 0.7261 | 0.7694 | 0.7738 | 0.7981 | 1 | 1 |
| 87  | HIV                  | A  | 2 | 198 | 99 | 99 | 0  | 0 | 0 | 0.5000 | 0.6927 | 0.7115 | 0.7801 | 0.7785 | 1 | 0 |
| 88  | HPS                  | A  | 2 | 178 | 99 | 79 | 0  | 0 | 0 | 0.5562 | 0.9556 | 0.9808 | 0.9869 | 0.9987 | 1 | 1 |
| 89  | HR                   | A  | 2 | 109 | 99 | 10 | 0  | 0 | 0 | 0.9083 | 0.9234 | 0.9407 | 0.9237 | 0.9455 | 1 | 1 |
| 90  | Hybridization        | T  | 2 | 198 | 99 | 99 | 0  | 0 | 0 | 0.5000 | 0.7879 | 0.8605 | 0.8744 | 0.8893 | 1 | 1 |
| 91  | IA                   | A  | 2 | 134 | 99 | 35 | 0  | 0 | 0 | 0.7388 | 0.8322 | 0.9394 | 0.9388 | 0.9725 | 1 | 1 |
| 92  | Ice                  | AT | 3 | 235 | 99 | 99 | 37 | 0 | 0 | 0.4213 | 0.8193 | 0.8552 | 0.8882 | 0.9192 | 1 | 1 |
| 93  | INDO                 | A  | 2 | 122 | 99 | 23 | 0  | 0 | 0 | 0.8115 | 0.8479 | 0.9536 | 0.9519 | 0.9646 | 1 | 1 |
| 94  | Ion                  | T  | 2 | 198 | 99 | 99 | 0  | 0 | 0 | 0.5000 | 0.7443 | 0.7903 | 0.8290 | 0.8488 | 1 | 1 |
| 95  | IP                   | A  | 2 | 196 | 99 | 97 | 0  | 0 | 0 | 0.5051 | 0.9259 | 0.9715 | 0.9793 | 0.9941 | 1 | 1 |
| 96  | Iris                 | T  | 2 | 161 | 99 | 62 | 0  | 0 | 0 | 0.6149 | 0.8202 | 0.8748 | 0.8946 | 0.9036 | 1 | 1 |
| 97  | ITP                  | A  | 2 | 198 | 99 | 99 | 0  | 0 | 0 | 0.5000 | 0.8694 | 0.9562 | 0.9679 | 0.9868 | 1 | 1 |
| 98  | JP                   | A  | 2 | 192 | 99 | 93 | 0  | 0 | 0 | 0.5156 | 0.9216 | 0.9644 | 0.9541 | 0.9834 | 1 | 1 |
| 99  | LABOR                | T  | 2 | 198 | 99 | 99 | 0  | 0 | 0 | 0.5000 | 0.7472 | 0.7902 | 0.8427 | 0.8495 | 1 | 1 |
| 100 | Lactation            | T  | 2 | 198 | 99 | 99 | 0  | 0 | 0 | 0.5000 | 0.7977 | 0.8406 | 0.8690 | 0.8873 | 1 | 1 |
| 101 | Language             | T  | 2 | 198 | 99 | 99 | 0  | 0 | 0 | 0.5000 | 0.7540 | 0.8186 | 0.8870 | 0.9014 | 1 | 1 |
| 102 | Laryngeal            | T  | 2 | 198 | 99 | 99 | 0  | 0 | 0 | 0.5000 | 0.6726 | 0.7485 | 0.7869 | 0.7828 | 1 | 0 |
| 103 | Lawsonia             | T  | 2 | 115 | 99 | 16 | 0  | 0 | 0 | 0.8609 | 0.8670 | 0.9379 | 0.9327 | 0.9606 | 1 | 1 |
| 104 | Leishmaniasis        | T  | 2 | 161 | 99 | 62 | 0  | 0 | 0 | 0.6149 | 0.8008 | 0.8388 | 0.8723 | 0.8908 | 1 | 1 |
| 105 | lens                 | T  | 3 | 297 | 99 | 99 | 99 | 0 | 0 | 0.3333 | 0.7036 | 0.7406 | 0.8007 | 0.7972 | 1 | 0 |
| 106 | Lupus                | T  | 3 | 297 | 99 | 99 | 99 | 0 | 0 | 0.3333 | 0.6730 | 0.6730 | 0.7804 | 0.7269 | 1 | 0 |
| 107 | lymphogranulomatosis | T  | 2 | 119 | 99 | 20 | 0  | 0 | 0 | 0.8319 | 0.8508 | 0.8832 | 0.8782 | 0.9073 | 1 | 1 |
| 108 | MAF                  | A  | 2 | 120 | 99 | 21 | 0  | 0 | 0 | 0.8250 | 0.8855 | 0.9641 | 0.9618 | 0.9809 | 1 | 1 |
| 109 | Malaria              | T  | 2 | 198 | 99 | 99 | 0  | 0 | 0 | 0.5000 | 0.7610 | 0.7971 | 0.8565 | 0.8457 | 1 | 0 |
| 110 | MBP                  | A  | 2 | 143 | 99 | 44 | 0  | 0 | 0 | 0.6923 | 0.7505 | 0.9089 | 0.9132 | 0.9444 | 1 | 1 |
| 111 | MCC                  | A  | 2 | 131 | 99 | 32 | 0  | 0 | 0 | 0.7557 | 0.8668 | 0.9883 | 0.9863 | 0.9987 | 1 | 1 |
| 112 | Medullary            | T  | 2 | 198 | 99 | 99 | 0  | 0 | 0 | 0.5000 | 0.7700 | 0.8250 | 0.8689 | 0.9029 | 1 | 1 |
| 113 | MHC                  | A  | 2 | 198 | 99 | 99 | 0  | 0 | 0 | 0.5000 | 0.8971 | 0.9563 | 0.9630 | 0.9849 | 1 | 1 |
| 114 | Milk                 | T  | 2 | 198 | 99 | 99 | 0  | 0 | 0 | 0.5000 | 0.7486 | 0.8117 | 0.8192 | 0.8394 | 1 | 1 |
| 115 | Moles                | T  | 2 | 174 | 99 | 75 | 0  | 0 | 0 | 0.5690 | 0.7859 | 0.8247 | 0.8841 | 0.8863 | 1 | 1 |
| 116 | MRS                  | A  | 2 | 166 | 99 | 67 | 0  | 0 | 0 | 0.5964 | 0.9511 | 0.9781 | 0.9792 | 0.9947 | 1 | 1 |
| 117 | Murine sarcoma virus | T  | 2 | 180 | 99 | 81 | 0  | 0 | 0 | 0.5500 | 0.6753 | 0.7140 | 0.7384 | 0.7330 | 1 | 0 |
| 118 | NBS                  | A  | 2 | 146 | 99 | 47 | 0  | 0 | 0 | 0.6781 | 0.9000 | 0.9783 | 0.9786 | 0.9962 | 1 | 1 |
| 119 | NEUROFIBROMATOSIS    | T  | 2 | 198 | 99 | 99 | 0  | 0 | 0 | 0.5000 | 0.7170 | 0.7519 | 0.7912 | 0.8068 | 1 | 1 |
| 120 | NM                   | A  | 2 | 122 | 84 | 38 | 0  | 0 | 0 | 0.6885 | 0.8112 | 0.8596 | 0.9208 | 0.9233 | 1 | 1 |
| 121 | NPC                  | A  | 2 | 163 | 99 | 64 | 0  | 0 | 0 | 0.6074 | 0.9627 | 0.9877 | 0.9897 | 0.9999 | 1 | 1 |

|     |                             |    |   |     |    |    |    |    |    |        |        |        |        |        |   |   |
|-----|-----------------------------|----|---|-----|----|----|----|----|----|--------|--------|--------|--------|--------|---|---|
| 122 | Nurse                       | T  | 2 | 198 | 99 | 99 | 0  | 0  | 0  | 0.5000 | 0.6490 | 0.7057 | 0.7733 | 0.7770 | 1 | 1 |
| 123 | Nursing                     | T  | 2 | 198 | 99 | 99 | 0  | 0  | 0  | 0.5000 | 0.7276 | 0.7085 | 0.8124 | 0.7620 | 1 | 0 |
| 124 | OCD                         | A  | 2 | 198 | 99 | 99 | 0  | 0  | 0  | 0.5000 | 0.8744 | 0.9683 | 0.9707 | 0.9963 | 1 | 1 |
| 125 | OH                          | A  | 2 | 198 | 99 | 99 | 0  | 0  | 0  | 0.5000 | 0.8200 | 0.9095 | 0.9378 | 0.9586 | 1 | 1 |
| 126 | Orf                         | AT | 2 | 198 | 99 | 99 | 0  | 0  | 0  | 0.5000 | 0.8706 | 0.8529 | 0.9343 | 0.9427 | 1 | 1 |
| 127 | ORI                         | A  | 2 | 123 | 99 | 24 | 0  | 0  | 0  | 0.8049 | 0.8677 | 0.9377 | 0.9580 | 0.9858 | 1 | 1 |
| 128 | PAF                         | A  | 2 | 115 | 99 | 16 | 0  | 0  | 0  | 0.8609 | 0.9021 | 0.9853 | 0.9887 | 0.9935 | 1 | 1 |
| 129 | Parotitis                   | T  | 2 | 198 | 99 | 99 | 0  | 0  | 0  | 0.5000 | 0.6952 | 0.7630 | 0.8079 | 0.8393 | 1 | 1 |
| 130 | PCA                         | A  | 5 | 491 | 99 | 99 | 99 | 99 | 95 | 0.2016 | 0.7591 | 0.8475 | 0.8942 | 0.9685 | 1 | 1 |
| 131 | PCB                         | A  | 2 | 127 | 99 | 28 | 0  | 0  | 0  | 0.7795 | 0.8675 | 0.9570 | 0.9585 | 0.9797 | 1 | 1 |
| 132 | PCD                         | A  | 2 | 198 | 99 | 99 | 0  | 0  | 0  | 0.5000 | 0.9266 | 0.9758 | 0.9786 | 0.9946 | 1 | 1 |
| 133 | PCP                         | A  | 3 | 297 | 99 | 99 | 99 | 0  | 0  | 0.3333 | 0.8599 | 0.9081 | 0.9388 | 0.9781 | 1 | 1 |
| 134 | PEP                         | A  | 2 | 198 | 99 | 99 | 0  | 0  | 0  | 0.5000 | 0.8578 | 0.9492 | 0.9616 | 0.9787 | 1 | 1 |
| 135 | PHA                         | A  | 2 | 110 | 99 | 11 | 0  | 0  | 0  | 0.9000 | 0.9077 | 0.9537 | 0.9423 | 0.9671 | 1 | 1 |
| 136 | Pharmaceutical              | T  | 2 | 198 | 99 | 99 | 0  | 0  | 0  | 0.5000 | 0.7823 | 0.8408 | 0.8791 | 0.8874 | 1 | 1 |
| 137 | Phosphorus                  | T  | 2 | 198 | 99 | 99 | 0  | 0  | 0  | 0.5000 | 0.6658 | 0.7387 | 0.7942 | 0.8032 | 1 | 1 |
| 138 | Phosphorylase               | T  | 2 | 166 | 99 | 67 | 0  | 0  | 0  | 0.5964 | 0.7338 | 0.8082 | 0.8094 | 0.8110 | 1 | 1 |
| 139 | pI                          | A  | 2 | 156 | 99 | 57 | 0  | 0  | 0  | 0.6346 | 0.8934 | 0.9620 | 0.9744 | 0.9862 | 1 | 1 |
| 140 | Plague                      | T  | 2 | 168 | 99 | 69 | 0  | 0  | 0  | 0.5893 | 0.7600 | 0.8260 | 0.8421 | 0.8568 | 1 | 1 |
| 141 | Plaque                      | T  | 2 | 197 | 99 | 98 | 0  | 0  | 0  | 0.5025 | 0.8845 | 0.9480 | 0.9646 | 0.9799 | 1 | 1 |
| 142 | Platelet                    | T  | 2 | 198 | 99 | 99 | 0  | 0  | 0  | 0.5000 | 0.6823 | 0.7262 | 0.7813 | 0.8058 | 1 | 1 |
| 143 | Pleuropneumonia             | T  | 2 | 198 | 99 | 99 | 0  | 0  | 0  | 0.5000 | 0.8113 | 0.8626 | 0.8821 | 0.9014 | 1 | 1 |
| 144 | Pneumocystis                | T  | 2 | 198 | 99 | 99 | 0  | 0  | 0  | 0.5000 | 0.7095 | 0.8060 | 0.8233 | 0.8141 | 1 | 0 |
| 145 | POL                         | A  | 2 | 162 | 99 | 63 | 0  | 0  | 0  | 0.6111 | 0.8479 | 0.9433 | 0.9585 | 0.9680 | 1 | 1 |
| 146 | Polymyalgia Rheumatica      | T  | 2 | 198 | 99 | 99 | 0  | 0  | 0  | 0.5000 | 0.7737 | 0.8482 | 0.8603 | 0.8874 | 1 | 1 |
| 147 | posterior pituitary         | T  | 2 | 194 | 99 | 95 | 0  | 0  | 0  | 0.5103 | 0.7746 | 0.7819 | 0.8278 | 0.8462 | 1 | 1 |
| 148 | Potassium                   | T  | 2 | 198 | 99 | 99 | 0  | 0  | 0  | 0.5000 | 0.7268 | 0.7600 | 0.8043 | 0.8140 | 1 | 1 |
| 149 | PR                          | A  | 2 | 165 | 99 | 66 | 0  | 0  | 0  | 0.6000 | 0.8230 | 0.9445 | 0.9546 | 0.9753 | 1 | 1 |
| 150 | Projection                  | T  | 2 | 198 | 99 | 99 | 0  | 0  | 0  | 0.5000 | 0.8067 | 0.8747 | 0.8816 | 0.9249 | 1 | 1 |
| 151 | PVC                         | A  | 2 | 198 | 99 | 99 | 0  | 0  | 0  | 0.5000 | 0.8983 | 0.9591 | 0.9656 | 0.9886 | 1 | 1 |
| 152 | RA                          | A  | 3 | 297 | 99 | 99 | 99 | 0  | 0  | 0.3333 | 0.8622 | 0.9066 | 0.9310 | 0.9753 | 1 | 1 |
| 153 | Radiation                   | T  | 2 | 198 | 99 | 99 | 0  | 0  | 0  | 0.5000 | 0.6912 | 0.7148 | 0.8056 | 0.7878 | 1 | 0 |
| 154 | RB                          | A  | 2 | 198 | 99 | 99 | 0  | 0  | 0  | 0.5000 | 0.8814 | 0.9388 | 0.9550 | 0.9709 | 1 | 1 |
| 155 | RBC                         | A  | 2 | 198 | 99 | 99 | 0  | 0  | 0  | 0.5000 | 0.6938 | 0.7217 | 0.7788 | 0.7892 | 1 | 1 |
| 156 | rDNA                        | A  | 2 | 198 | 99 | 99 | 0  | 0  | 0  | 0.5000 | 0.7227 | 0.7524 | 0.8241 | 0.8297 | 1 | 1 |
| 157 | Respiration                 | T  | 2 | 198 | 99 | 99 | 0  | 0  | 0  | 0.5000 | 0.7297 | 0.7980 | 0.8576 | 0.8672 | 1 | 1 |
| 158 | Retinal                     | T  | 2 | 198 | 99 | 99 | 0  | 0  | 0  | 0.5000 | 0.7211 | 0.7494 | 0.8222 | 0.8274 | 1 | 1 |
| 159 | Root                        | T  | 2 | 198 | 99 | 99 | 0  | 0  | 0  | 0.5000 | 0.8688 | 0.8758 | 0.8966 | 0.9277 | 1 | 1 |
| 160 | RSV                         | A  | 2 | 134 | 99 | 35 | 0  | 0  | 0  | 0.7388 | 0.8528 | 0.9446 | 0.9470 | 0.9703 | 1 | 1 |
| 161 | SARS-associated coronavirus | T  | 2 | 118 | 71 | 47 | 0  | 0  | 0  | 0.6017 | 0.8301 | 0.8727 | 0.8906 | 0.8865 | 1 | 0 |
| 162 | SARS                        | A  | 2 | 198 | 99 | 99 | 0  | 0  | 0  | 0.5000 | 0.8622 | 0.8838 | 0.9280 | 0.9314 | 1 | 1 |
| 163 | SCD                         | A  | 2 | 198 | 99 | 99 | 0  | 0  | 0  | 0.5000 | 0.8977 | 0.9576 | 0.9677 | 0.9946 | 1 | 1 |
| 164 | Schistosoma mansoni         | T  | 2 | 198 | 99 | 99 | 0  | 0  | 0  | 0.5000 | 0.7351 | 0.7491 | 0.8037 | 0.7978 | 1 | 0 |
| 165 | Semen                       | T  | 2 | 186 | 99 | 87 | 0  | 0  | 0  | 0.5323 | 0.7584 | 0.8414 | 0.8649 | 0.8816 | 1 | 1 |
| 166 | sex factor                  | T  | 2 | 131 | 96 | 35 | 0  | 0  | 0  | 0.7328 | 0.7872 | 0.8621 | 0.9003 | 0.9115 | 1 | 1 |
| 167 | SLS                         | A  | 2 | 164 | 99 | 65 | 0  | 0  | 0  | 0.6037 | 0.9353 | 0.9880 | 0.9865 | 1.0000 | 1 | 1 |
| 168 | Sodium                      | T  | 2 | 197 | 99 | 98 | 0  | 0  | 0  | 0.5025 | 0.7279 | 0.7597 | 0.7756 | 0.7810 | 1 | 1 |
| 169 | SPR                         | A  | 2 | 198 | 99 | 99 | 0  | 0  | 0  | 0.5000 | 0.9490 | 0.9777 | 0.9821 | 0.9984 | 1 | 1 |

|     |               |    |   |     |    |    |    |   |   |        |        |        |        |        |   |   |
|-----|---------------|----|---|-----|----|----|----|---|---|--------|--------|--------|--------|--------|---|---|
| 170 | SS            | A  | 2 | 144 | 98 | 46 | 0  | 0 | 0 | 0.6806 | 0.9184 | 0.9808 | 0.9779 | 0.9990 | 1 | 1 |
| 171 | Staph         | T  | 2 | 198 | 99 | 99 | 0  | 0 | 0 | 0.5000 | 0.7318 | 0.7142 | 0.7804 | 0.7906 | 1 | 1 |
| 172 | STEM          | AT | 2 | 198 | 99 | 99 | 0  | 0 | 0 | 0.5000 | 0.9048 | 0.9337 | 0.9448 | 0.9657 | 1 | 1 |
| 173 | Sterilization | T  | 2 | 198 | 99 | 99 | 0  | 0 | 0 | 0.5000 | 0.7234 | 0.7703 | 0.8188 | 0.8441 | 1 | 1 |
| 174 | Strep         | T  | 2 | 197 | 99 | 98 | 0  | 0 | 0 | 0.5025 | 0.7526 | 0.7887 | 0.8114 | 0.8080 | 1 | 0 |
| 175 | Synapsis      | T  | 2 | 134 | 99 | 35 | 0  | 0 | 0 | 0.7388 | 0.8501 | 0.8972 | 0.9022 | 0.9142 | 1 | 1 |
| 176 | TAT           | A  | 3 | 297 | 99 | 99 | 99 | 0 | 0 | 0.3333 | 0.6961 | 0.7548 | 0.7840 | 0.7848 | 1 | 1 |
| 177 | Tax           | AT | 2 | 180 | 99 | 81 | 0  | 0 | 0 | 0.5500 | 0.8749 | 0.8856 | 0.9295 | 0.9317 | 1 | 1 |
| 178 | TEM           | A  | 2 | 198 | 99 | 99 | 0  | 0 | 0 | 0.5000 | 0.8499 | 0.8857 | 0.9357 | 0.9777 | 1 | 1 |
| 179 | THYMUS        | T  | 3 | 297 | 99 | 99 | 99 | 0 | 0 | 0.3333 | 0.7493 | 0.7525 | 0.8136 | 0.8252 | 1 | 1 |
| 180 | TLC           | A  | 2 | 198 | 99 | 99 | 0  | 0 | 0 | 0.5000 | 0.9157 | 0.9650 | 0.9764 | 0.9885 | 1 | 1 |
| 181 | TMJ           | A  | 2 | 198 | 99 | 99 | 0  | 0 | 0 | 0.5000 | 0.6671 | 0.6738 | 0.7507 | 0.7359 | 1 | 0 |
| 182 | TMP           | A  | 2 | 150 | 99 | 51 | 0  | 0 | 0 | 0.6600 | 0.7815 | 0.8864 | 0.9057 | 0.9308 | 1 | 1 |
| 183 | TNC           | A  | 2 | 167 | 99 | 68 | 0  | 0 | 0 | 0.5928 | 0.9324 | 0.9730 | 0.9752 | 0.9966 | 1 | 1 |
| 184 | TNT           | A  | 2 | 198 | 99 | 99 | 0  | 0 | 0 | 0.5000 | 0.9233 | 0.9718 | 0.9677 | 0.9939 | 1 | 1 |
| 185 | Tolerance     | T  | 2 | 198 | 99 | 99 | 0  | 0 | 0 | 0.5000 | 0.7822 | 0.8322 | 0.8491 | 0.8758 | 1 | 1 |
| 186 | tomography    | T  | 2 | 198 | 99 | 99 | 0  | 0 | 0 | 0.5000 | 0.7762 | 0.7738 | 0.8205 | 0.8380 | 1 | 1 |
| 187 | Torula        | T  | 2 | 122 | 88 | 34 | 0  | 0 | 0 | 0.7213 | 0.7997 | 0.8394 | 0.8457 | 0.8487 | 1 | 1 |
| 188 | TPA           | A  | 2 | 198 | 99 | 99 | 0  | 0 | 0 | 0.5000 | 0.8937 | 0.9372 | 0.9581 | 0.9773 | 1 | 1 |
| 189 | TPO           | A  | 2 | 198 | 99 | 99 | 0  | 0 | 0 | 0.5000 | 0.8636 | 0.9302 | 0.9487 | 0.9738 | 1 | 1 |
| 190 | TRF           | A  | 2 | 179 | 99 | 80 | 0  | 0 | 0 | 0.5531 | 0.9105 | 0.9404 | 0.9552 | 0.9730 | 1 | 1 |
| 191 | TYR           | A  | 2 | 198 | 99 | 99 | 0  | 0 | 0 | 0.5000 | 0.7728 | 0.8776 | 0.8937 | 0.8991 | 1 | 1 |
| 192 | US            | A  | 2 | 198 | 99 | 99 | 0  | 0 | 0 | 0.5000 | 0.7600 | 0.8024 | 0.8895 | 0.9152 | 1 | 1 |
| 193 | Ventricles    | T  | 2 | 198 | 99 | 99 | 0  | 0 | 0 | 0.5000 | 0.7659 | 0.8668 | 0.8975 | 0.9145 | 1 | 1 |
| 194 | veterinary    | T  | 2 | 198 | 99 | 99 | 0  | 0 | 0 | 0.5000 | 0.6474 | 0.6785 | 0.7061 | 0.6790 | 1 | 0 |
| 195 | Wasp          | AT | 2 | 198 | 99 | 99 | 0  | 0 | 0 | 0.5000 | 0.9095 | 0.9200 | 0.9504 | 0.9691 | 1 | 1 |
| 196 | WBS           | A  | 2 | 128 | 93 | 35 | 0  | 0 | 0 | 0.7266 | 0.8542 | 0.9586 | 0.9407 | 0.9872 | 1 | 1 |
| 197 | WT1           | A  | 2 | 198 | 99 | 99 | 0  | 0 | 0 | 0.5000 | 0.7220 | 0.7063 | 0.7708 | 0.7730 | 1 | 1 |
| 198 | Yellow Fever  | T  | 2 | 183 | 99 | 84 | 0  | 0 | 0 | 0.5410 | 0.7270 | 0.8293 | 0.8684 | 0.8773 | 1 | 1 |

**Table A2.** Interactive learning results for 74 ambiguous abbreviations in the UMN corpus. Please see the caption of Table A1 for explanation of the header.

| ID | Word | Type | #S | #inst | #inst in top 5 senses |     |     |    |    | major sense ratio | ALC scores |        |        |        | IL > AL | IL > RR |
|----|------|------|----|-------|-----------------------|-----|-----|----|----|-------------------|------------|--------|--------|--------|---------|---------|
|    |      |      |    |       | S1                    | S2  | S3  | S4 | S5 |                   | RS         | AL     | RR     | IL     |         |         |
| 1  | AB   | A    | 11 | 499   | 345                   | 137 | 8   | 2  | 1  | 0.6914            | 0.7117     | 0.7296 | 0.7310 | 0.8478 | 1       | 1       |
| 2  | VBG  | A    | 2  | 500   | 299                   | 201 | 0   | 0  | 0  | 0.5980            | 0.8961     | 0.9449 | 0.9446 | 0.9622 | 1       | 1       |
| 3  | AC   | A    | 11 | 500   | 161                   | 158 | 118 | 42 | 9  | 0.3220            | 0.6691     | 0.6959 | 0.7053 | 0.8040 | 1       | 1       |
| 4  | ALD  | A    | 5  | 500   | 407                   | 88  | 3   | 1  | 1  | 0.8140            | 0.8731     | 0.9212 | 0.9160 | 0.9542 | 1       | 1       |
| 5  | AMA  | A    | 3  | 500   | 444                   | 31  | 25  | 0  | 0  | 0.8880            | 0.8798     | 0.9137 | 0.9259 | 0.9499 | 1       | 1       |
| 6  | ASA  | A    | 3  | 500   | 404                   | 93  | 3   | 0  | 0  | 0.8080            | 0.9080     | 0.9374 | 0.9378 | 0.9560 | 1       | 1       |
| 7  | AVR  | A    | 7  | 500   | 381                   | 103 | 5   | 4  | 4  | 0.7620            | 0.7635     | 0.8105 | 0.7975 | 0.9073 | 1       | 1       |
| 8  | AV   | A    | 4  | 500   | 374                   | 116 | 8   | 2  | 0  | 0.7480            | 0.7678     | 0.8054 | 0.8054 | 0.8663 | 1       | 1       |
| 9  | BAL  | A    | 2  | 500   | 457                   | 43  | 0   | 0  | 0  | 0.9140            | 0.8973     | 0.9392 | 0.9446 | 0.9704 | 1       | 1       |
| 10 | BK   | A    | 2  | 500   | 343                   | 157 | 0   | 0  | 0  | 0.6860            | 0.8222     | 0.9244 | 0.9422 | 0.9550 | 1       | 1       |
| 11 | BMP  | A    | 4  | 500   | 456                   | 36  | 7   | 1  | 0  | 0.9120            | 0.8443     | 0.8484 | 0.8406 | 0.9026 | 1       | 1       |
| 12 | BM   | A    | 4  | 500   | 459                   | 25  | 14  | 2  | 0  | 0.9180            | 0.8855     | 0.9005 | 0.8914 | 0.9381 | 1       | 1       |
| 13 | C&S  | A    | 5  | 500   | 434                   | 47  | 16  | 2  | 1  | 0.8680            | 0.9410     | 0.9783 | 0.9784 | 0.9832 | 1       | 1       |
| 14 | C3   | A    | 4  | 500   | 249                   | 243 | 6   | 2  | 0  | 0.4980            | 0.8442     | 0.8622 | 0.8887 | 0.9262 | 1       | 1       |
| 15 | C4   | A    | 5  | 500   | 261                   | 231 | 6   | 1  | 1  | 0.5220            | 0.8058     | 0.8479 | 0.8540 | 0.9046 | 1       | 1       |
| 16 | CA   | A    | 4  | 500   | 391                   | 105 | 2   | 2  | 0  | 0.7820            | 0.7840     | 0.8139 | 0.8332 | 0.8570 | 1       | 1       |
| 17 | CDI  | A    | 4  | 500   | 270                   | 225 | 3   | 2  | 0  | 0.5400            | 0.8780     | 0.9224 | 0.9168 | 0.9655 | 1       | 1       |
| 18 | CEA  | A    | 5  | 500   | 444                   | 53  | 1   | 1  | 1  | 0.8880            | 0.8423     | 0.8732 | 0.8772 | 0.9240 | 1       | 1       |
| 19 | CR   | A    | 6  | 500   | 453                   | 28  | 16  | 1  | 1  | 0.9060            | 0.9122     | 0.9315 | 0.9315 | 0.9443 | 1       | 1       |
| 20 | CTA  | A    | 5  | 500   | 396                   | 100 | 2   | 1  | 1  | 0.7920            | 0.8832     | 0.9249 | 0.9246 | 0.9661 | 1       | 1       |
| 21 | CVA  | A    | 2  | 500   | 278                   | 222 | 0   | 0  | 0  | 0.5560            | 0.9133     | 0.9516 | 0.9470 | 0.9653 | 1       | 1       |
| 22 | CVP  | A    | 3  | 500   | 436                   | 62  | 2   | 0  | 0  | 0.8720            | 0.8705     | 0.9296 | 0.9141 | 0.9603 | 1       | 1       |
| 23 | CVS  | A    | 3  | 500   | 457                   | 41  | 2   | 0  | 0  | 0.9140            | 0.9255     | 0.9699 | 0.9595 | 0.9784 | 1       | 1       |
| 24 | DC   | A    | 8  | 500   | 282                   | 152 | 31  | 31 | 1  | 0.5640            | 0.6331     | 0.6714 | 0.6981 | 0.7834 | 1       | 1       |
| 25 | DIP  | A    | 3  | 500   | 462                   | 36  | 2   | 0  | 0  | 0.9240            | 0.9262     | 0.9590 | 0.9613 | 0.9827 | 1       | 1       |
| 26 | DM   | A    | 5  | 500   | 286                   | 209 | 3   | 1  | 1  | 0.5720            | 0.8098     | 0.8552 | 0.8656 | 0.9128 | 1       | 1       |
| 27 | DT   | A    | 8  | 500   | 336                   | 129 | 23  | 4  | 3  | 0.6720            | 0.6923     | 0.7470 | 0.7365 | 0.8373 | 1       | 1       |
| 28 | EC   | A    | 5  | 499   | 439                   | 45  | 11  | 2  | 2  | 0.8798            | 0.8945     | 0.9137 | 0.9065 | 0.9370 | 1       | 1       |
| 29 | ER   | A    | 3  | 500   | 448                   | 34  | 18  | 0  | 0  | 0.8960            | 0.8996     | 0.9240 | 0.9345 | 0.9539 | 1       | 1       |
| 30 | ES   | A    | 6  | 500   | 469                   | 14  | 8   | 7  | 1  | 0.9380            | 0.8394     | 0.8359 | 0.8315 | 0.9355 | 1       | 1       |
| 31 | ET   | A    | 8  | 500   | 289                   | 200 | 6   | 1  | 1  | 0.5780            | 0.7731     | 0.8389 | 0.8289 | 0.9287 | 1       | 1       |
| 32 | FISH | AT   | 2  | 500   | 449                   | 51  | 0   | 0  | 0  | 0.8980            | 0.9152     | 0.9772 | 0.9748 | 0.9889 | 1       | 1       |
| 33 | FSH  | A    | 3  | 500   | 265                   | 231 | 4   | 0  | 0  | 0.5300            | 0.7603     | 0.8267 | 0.8345 | 0.8691 | 1       | 1       |
| 34 | GT   | A    | 6  | 500   | 446                   | 30  | 16  | 5  | 2  | 0.8920            | 0.8479     | 0.8648 | 0.8527 | 0.9094 | 1       | 1       |
| 35 | IA   | A    | 9  | 500   | 275                   | 176 | 19  | 11 | 5  | 0.5500            | 0.7305     | 0.7704 | 0.7564 | 0.8725 | 1       | 1       |
| 36 | IB   | A    | 9  | 500   | 472                   | 8   | 8   | 5  | 2  | 0.9440            | 0.8470     | 0.8604 | 0.8619 | 0.9477 | 1       | 1       |
| 37 | IM   | A    | 3  | 500   | 461                   | 38  | 1   | 0  | 0  | 0.9220            | 0.8934     | 0.9286 | 0.9269 | 0.9604 | 1       | 1       |
| 38 | IR   | A    | 5  | 500   | 394                   | 102 | 2   | 1  | 1  | 0.7880            | 0.8695     | 0.9047 | 0.9043 | 0.9522 | 1       | 1       |
| 39 | IT   | AT   | 12 | 500   | 225                   | 103 | 58  | 48 | 40 | 0.4500            | 0.5951     | 0.6022 | 0.6329 | 0.7505 | 1       | 1       |
| 40 | IVF  | A    | 4  | 500   | 308                   | 188 | 3   | 1  | 0  | 0.6160            | 0.8594     | 0.8785 | 0.8922 | 0.9182 | 1       | 1       |
| 41 | LA   | A    | 6  | 500   | 426                   | 40  | 30  | 2  | 1  | 0.8520            | 0.8719     | 0.9085 | 0.9055 | 0.9441 | 1       | 1       |
| 42 | LE   | A    | 9  | 500   | 345                   | 134 | 5   | 5  | 3  | 0.6900            | 0.7220     | 0.8070 | 0.7870 | 0.8951 | 1       | 1       |
| 43 | MOM  | A    | 4  | 500   | 439                   | 57  | 3   | 1  | 0  | 0.8780            | 0.9683     | 0.9864 | 0.9798 | 0.9908 | 1       | 1       |
| 44 | MP   | A    | 14 | 500   | 179                   | 107 | 105 | 55 | 12 | 0.3580            | 0.3826     | 0.4144 | 0.4161 | 0.5390 | 1       | 1       |
| 45 | MR   | A    | 6  | 500   | 314                   | 176 | 5   | 3  | 1  | 0.6280            | 0.7695     | 0.8079 | 0.8141 | 0.8990 | 1       | 1       |
| 46 | MSSA | A    | 2  | 500   | 418                   | 82  | 0   | 0  | 0  | 0.8360            | 0.8539     | 0.9239 | 0.9142 | 0.9426 | 1       | 1       |

|    |     |    |    |     |     |     |     |    |   |        |        |        |        |        |   |   |
|----|-----|----|----|-----|-----|-----|-----|----|---|--------|--------|--------|--------|--------|---|---|
| 47 | MS  | A  | 10 | 500 | 279 | 207 | 4   | 3  | 2 | 0.5580 | 0.6551 | 0.6979 | 0.7002 | 0.7818 | 1 | 1 |
| 48 | NAD | A  | 2  | 500 | 377 | 123 | 0   | 0  | 0 | 0.7540 | 0.8469 | 0.8805 | 0.9071 | 0.9102 | 1 | 1 |
| 49 | NA  | A  | 5  | 500 | 474 | 14  | 10  | 1  | 1 | 0.9480 | 0.9644 | 0.9759 | 0.9726 | 0.9856 | 1 | 1 |
| 50 | NP  | A  | 6  | 500 | 438 | 53  | 5   | 2  | 1 | 0.8760 | 0.8601 | 0.9044 | 0.8987 | 0.9508 | 1 | 1 |
| 51 | OP  | A  | 8  | 500 | 308 | 121 | 55  | 6  | 5 | 0.6160 | 0.8660 | 0.8938 | 0.8815 | 0.9519 | 1 | 1 |
| 52 | OR  | AT | 4  | 500 | 466 | 32  | 1   | 1  | 0 | 0.9320 | 0.9160 | 0.9412 | 0.9427 | 0.9665 | 1 | 1 |
| 53 | OTC | A  | 2  | 500 | 469 | 31  | 0   | 0  | 0 | 0.9380 | 0.9292 | 0.9502 | 0.9259 | 0.9534 | 1 | 1 |
| 54 | PAC | A  | 10 | 500 | 275 | 137 | 47  | 25 | 7 | 0.5500 | 0.6971 | 0.7157 | 0.7340 | 0.8519 | 1 | 1 |
| 55 | PA  | A  | 8  | 500 | 212 | 138 | 83  | 61 | 2 | 0.4240 | 0.6909 | 0.7359 | 0.7415 | 0.8531 | 1 | 1 |
| 56 | PCP | A  | 5  | 500 | 294 | 111 | 93  | 1  | 1 | 0.5880 | 0.6967 | 0.7432 | 0.7638 | 0.7977 | 1 | 1 |
| 57 | PDA | A  | 3  | 500 | 361 | 138 | 1   | 0  | 0 | 0.7220 | 0.7618 | 0.8402 | 0.8705 | 0.8849 | 1 | 1 |
| 58 | PD  | A  | 15 | 500 | 409 | 34  | 14  | 9  | 8 | 0.8180 | 0.6612 | 0.6786 | 0.6822 | 0.8848 | 1 | 1 |
| 59 | PE  | A  | 4  | 500 | 408 | 89  | 2   | 1  | 0 | 0.8160 | 0.7921 | 0.8656 | 0.8715 | 0.9256 | 1 | 1 |
| 60 | PM  | A  | 4  | 500 | 423 | 74  | 2   | 1  | 0 | 0.8460 | 0.8290 | 0.9001 | 0.8718 | 0.9363 | 1 | 1 |
| 61 | PR  | A  | 7  | 500 | 252 | 141 | 88  | 12 | 4 | 0.5040 | 0.8883 | 0.9081 | 0.9073 | 0.9566 | 1 | 1 |
| 62 | PT  | A  | 5  | 500 | 455 | 22  | 21  | 1  | 1 | 0.9100 | 0.8822 | 0.9077 | 0.9116 | 0.9473 | 1 | 1 |
| 63 | RA  | A  | 5  | 500 | 394 | 66  | 36  | 3  | 1 | 0.7880 | 0.7666 | 0.8142 | 0.8103 | 0.8618 | 1 | 1 |
| 64 | RT  | A  | 8  | 500 | 336 | 149 | 7   | 2  | 2 | 0.6720 | 0.8177 | 0.8475 | 0.8402 | 0.9190 | 1 | 1 |
| 65 | SA  | A  | 7  | 498 | 373 | 88  | 29  | 4  | 2 | 0.7490 | 0.8506 | 0.8968 | 0.9078 | 0.9357 | 1 | 1 |
| 66 | SBP | A  | 2  | 500 | 417 | 83  | 0   | 0  | 0 | 0.8340 | 0.8495 | 0.8920 | 0.9098 | 0.9102 | 1 | 1 |
| 67 | SMA | A  | 6  | 500 | 353 | 84  | 56  | 3  | 2 | 0.7060 | 0.6944 | 0.7316 | 0.7389 | 0.8262 | 1 | 1 |
| 68 | SS  | A  | 3  | 500 | 439 | 57  | 4   | 0  | 0 | 0.8780 | 0.9767 | 0.9843 | 0.9803 | 0.9857 | 1 | 1 |
| 69 | T1  | A  | 6  | 500 | 198 | 194 | 103 | 3  | 1 | 0.3960 | 0.6762 | 0.6843 | 0.7335 | 0.7642 | 1 | 1 |
| 70 | T2  | A  | 7  | 500 | 227 | 166 | 97  | 7  | 1 | 0.4540 | 0.6620 | 0.7060 | 0.7184 | 0.7721 | 1 | 1 |
| 71 | T3  | A  | 6  | 500 | 268 | 156 | 65  | 5  | 4 | 0.5360 | 0.7294 | 0.7980 | 0.7970 | 0.8710 | 1 | 1 |
| 72 | T4  | A  | 3  | 500 | 424 | 41  | 35  | 0  | 0 | 0.8480 | 0.8407 | 0.8959 | 0.9079 | 0.9374 | 1 | 1 |
| 73 | US  | AT | 4  | 500 | 402 | 94  | 3   | 1  | 0 | 0.8040 | 0.8439 | 0.8952 | 0.9035 | 0.9131 | 1 | 1 |
| 74 | VAD | A  | 5  | 500 | 396 | 87  | 13  | 3  | 1 | 0.7920 | 0.7662 | 0.7912 | 0.8145 | 0.8765 | 1 | 1 |

**Table A3.** Interactive learning results for 24 ambiguous abbreviations in the VUH corpus. Please see the caption of Table A1 for explanation of the header.

| ID | Word | Type | #S | #inst | #inst in top 5 senses |    |    |    |    | major sense ratio | ALC scores |        |        |        | IL > AL | IL > RR |
|----|------|------|----|-------|-----------------------|----|----|----|----|-------------------|------------|--------|--------|--------|---------|---------|
|    |      |      |    |       | S1                    | S2 | S3 | S4 | S5 |                   | RS         | AL     | RR     | IL     |         |         |
| 1  | ad   | AT   | 9  | 200   | 181                   | 6  | 4  | 3  | 2  | 0.9050            | 0.7820     | 0.7535 | 0.7877 | 0.8490 | 1       | 1       |
| 2  | ag   | A    | 3  | 171   | 117                   | 51 | 3  | 0  | 0  | 0.6842            | 0.7668     | 0.7938 | 0.8198 | 0.8040 | 1       | 0       |
| 3  | bm   | A    | 7  | 199   | 128                   | 54 | 11 | 2  | 2  | 0.6432            | 0.6803     | 0.6704 | 0.7207 | 0.7551 | 1       | 1       |
| 4  | ca   | A    | 6  | 200   | 128                   | 37 | 19 | 8  | 7  | 0.6400            | 0.8377     | 0.8544 | 0.8728 | 0.8451 | 0       | 0       |
| 5  | cc   | A    | 6  | 200   | 114                   | 32 | 30 | 18 | 4  | 0.5700            | 0.8150     | 0.7913 | 0.8374 | 0.8792 | 1       | 1       |
| 6  | cm   | A    | 2  | 200   | 199                   | 1  | 0  | 0  | 0  | 0.9950            | 0.9748     | 0.9724 | 0.9760 | 0.9815 | 1       | 1       |
| 7  | dm   | A    | 2  | 200   | 170                   | 30 | 0  | 0  | 0  | 0.8500            | 0.7908     | 0.8174 | 0.8526 | 0.8745 | 1       | 1       |
| 8  | gtt  | A    | 4  | 200   | 143                   | 46 | 9  | 2  | 0  | 0.7150            | 0.8460     | 0.8429 | 0.8787 | 0.8643 | 1       | 0       |
| 9  | hd   | A    | 8  | 199   | 112                   | 79 | 3  | 1  | 1  | 0.5628            | 0.4951     | 0.4892 | 0.4911 | 0.5209 | 1       | 1       |
| 10 | hs   | A    | 6  | 191   | 147                   | 20 | 13 | 8  | 2  | 0.7696            | 0.7337     | 0.7369 | 0.7619 | 0.8128 | 1       | 1       |
| 11 | icd  | A    | 2  | 199   | 195                   | 4  | 0  | 0  | 0  | 0.9799            | 0.9732     | 0.9661 | 0.9795 | 0.9388 | 0       | 0       |
| 12 | lad  | A    | 4  | 200   | 150                   | 48 | 1  | 1  | 0  | 0.7500            | 0.8824     | 0.9013 | 0.9142 | 0.9376 | 1       | 1       |
| 13 | le   | A    | 3  | 200   | 178                   | 14 | 8  | 0  | 0  | 0.8900            | 0.9093     | 0.9190 | 0.9112 | 0.9365 | 1       | 1       |
| 14 | ln   | A    | 3  | 144   | 136                   | 4  | 4  | 0  | 0  | 0.9444            | 0.8999     | 0.9092 | 0.9100 | 0.9570 | 1       | 1       |
| 15 | med  | A    | 5  | 195   | 96                    | 79 | 12 | 6  | 2  | 0.4923            | 0.6887     | 0.6898 | 0.7093 | 0.7364 | 1       | 1       |
| 16 | mg   | A    | 2  | 200   | 197                   | 3  | 0  | 0  | 0  | 0.9850            | 0.9734     | 0.9753 | 0.9761 | 0.9834 | 1       | 1       |
| 17 | mi   | A    | 2  | 200   | 199                   | 1  | 0  | 0  | 0  | 0.9950            | 0.9563     | 0.9492 | 0.9565 | 0.9894 | 1       | 1       |
| 18 | pe   | A    | 5  | 200   | 65                    | 61 | 53 | 16 | 5  | 0.3250            | 0.6781     | 0.6853 | 0.7251 | 0.7503 | 1       | 1       |
| 19 | pt   | A    | 5  | 198   | 179                   | 9  | 6  | 2  | 2  | 0.9040            | 0.7895     | 0.7519 | 0.8036 | 0.8462 | 1       | 1       |
| 20 | ra   | A    | 4  | 200   | 149                   | 36 | 14 | 1  | 0  | 0.7450            | 0.8623     | 0.8762 | 0.8856 | 0.9029 | 1       | 1       |
| 21 | si   | A    | 3  | 185   | 168                   | 16 | 1  | 0  | 0  | 0.9081            | 0.8890     | 0.9080 | 0.9107 | 0.9308 | 1       | 1       |
| 22 | sle  | A    | 3  | 185   | 178                   | 6  | 1  | 0  | 0  | 0.9622            | 0.9244     | 0.8794 | 0.9351 | 0.8895 | 1       | 0       |
| 23 | ss   | A    | 6  | 196   | 116                   | 47 | 27 | 3  | 2  | 0.5918            | 0.8511     | 0.8820 | 0.9056 | 0.9411 | 1       | 1       |
| 24 | tia  | A    | 2  | 200   | 199                   | 1  | 0  | 0  | 0  | 0.9950            | 0.9457     | 0.9268 | 0.9366 | 0.9551 | 1       | 1       |
